# Supplementary material for: Improving long-lasting insecticidal nets use in Kayange community of north-western Burundi: a pilot study exploring the use of quality improvement methodologies in low-resource community settings
Source: PubMed Central journal article supplement — BMJ Open Qual. 2019 Aug 20;8(3):e000540. doi: 10.1136/bmjoq-2018-000540 (PMC6711436; doi:10.1136/bmjoq-2018-000540), 2019-08-20
Supplement: bmjoq-2018-000540supp002.pdf [file bmjoq-2018-000540supp002.pdf]

## APPENDIX 4. QUESTIONNAIRE

## IMPROVING LONG-LASTING INSECTICIDAL NEST USE IN KAYANGE COMMUNITY OF NORTH-WESTERN BURUNDI: A QUALITY IMPROVEMENT STUDY

## INDIVIDUAL QUESTIONNAIRE

Country: Burundi  
 Province : Bubanza  
 Commune : Rugazi  
 Hill : Kayange – Nyagatobe

Household serial number \_\_\_\_\_

**Dear Participant,**

Ndi umuganga yiga muri Afrika yepfo, ndiko ndanonosora inyigisho zijanye n'ubushakashatsi mu vy'amagara y'abantu. Iki cigwa turiko turakora kigamije tuteza imbere amagara y'abarundi bifatiye kukugwanya indwara ya Malariya. Twifuza kwiga ukuntu twogwanya malariya mukuryama mumusegetera urimwo umuti wica imibu iminsi yose. Tuzokoresha ubuhinga twize kugira ngo ivyo tubishikeko. Mwebwe rero muri uyu muhana, muri mubantu mwatowe ngo mwunganire muri iki cirwa kibaye irya mbere mu Burundi. Intererano yanyu mukwishura ivyo tuzobabaza irahambaye cane kuko bizotuma tumenya ukuntu tubigenza kugirango dushike kunyishu yo kurwanya malariya. Ntagahato kariwmo, umuntu wese yishura kukibazo yumvise ko kimutomokeye. Tubamenyesheje ko inyishu mutanga tutazozararaza, ni ibanga riri hagati yacu namwe gusa, kandi inyishu mutanga tuzozikoresha muri iki cigwa gusa.

**MURAKOZE!**

*I am a post-graduate student studying towards my MSc in Epidemiology in the field of implementation Science at the University of the Witwatersrand, Johannesburg South Africa. The aim of my study is to improve long-lasting insecticidal nets usage in Muyange community using small tests of change. Your household was selected for the survey that will be conducted by my research team. I believe that my study would make a contribution to improving long-lasting insecticidal nets service by the government and overall plan for addressing the scourge of mosquito's infestation and malaria transmission in Muyange community and Burundi at large.*

*As one of the selected respondents, your views are invaluable to the success of this study. Your responses to the questions are highly appreciated and it should not take more than twenty minutes of your time and we want to thank you in advance for your co-operation. We guarantee that all information will be handled with the utmost CONFIDENTIALITY. Thank you very much.*

*Dr. Desire Habonimana & Research Team Members.*

| Section 1: Socio-demographic characteristics of respondents |                                                                                                    |                                                                                                                           |
|-------------------------------------------------------------|----------------------------------------------------------------------------------------------------|---------------------------------------------------------------------------------------------------------------------------|
| No                                                          | IKIBAZO/Question                                                                                   | Inyishu/Response                                                                                                          |
| 101                                                         | Wavutse ryari? <i>What is your age?</i>                                                            |                                                                                                                           |
| 102                                                         | Wize gushika mumwaka wakangahe?<br><i>What is your level of education?</i>                         | 1. Primary _____<br>2. Secondary _____<br>3. Tertiary _____<br>4. No formal education _____                               |
| 103                                                         | Urubatse?<br><i>What is your marital status?</i>                                                   | 1. Single _____<br>2. Married _____<br>3. Divorced _____<br>4. Separated _____<br>5. Windowed _____<br>6. No answer _____ |
| 104                                                         | Ukazi usanzwe ukora ni akahe?<br><i>What is your occupation?</i>                                   | 1. Full-time housewife _____<br>2. Civil servant _____<br>2. Trader _____<br>3. Farmer _____<br>4. Other (specify) _____  |
| Section 2: Household data                                   |                                                                                                    |                                                                                                                           |
| No                                                          | IKIBAZO/Question                                                                                   | Inyishu/Response                                                                                                          |
| 201                                                         | Muri bangahe muri iyi nzu? <i>How many people are there in this house?</i>                         |                                                                                                                           |
| 202                                                         | Ni bangahe bansangira kunkoko imwe? <i>How many people in this house eat from the sate pot?</i>    |                                                                                                                           |
| 203                                                         | Muhise abana bangahe baru muni y'imyaka 5? <i>How many children under 5 are in this household?</i> |                                                                                                                           |
| 204                                                         | Mufise abagore bibungze bangahe muriyi nzu? <i>How many pregnant women are in this household?</i>  |                                                                                                                           |

| Section 3: LLIN ownership           |                                                                                                                                                                           |                                                                                                                                                                                                                                                                 |
|-------------------------------------|---------------------------------------------------------------------------------------------------------------------------------------------------------------------------|-----------------------------------------------------------------------------------------------------------------------------------------------------------------------------------------------------------------------------------------------------------------|
| No                                  | IKIBAZO/Question                                                                                                                                                          | Inyishu/Response                                                                                                                                                                                                                                                |
| 301                                 | Murafise umusegetera muri iyi nzu? <i>Do you have any LLIN in your household?</i>                                                                                         | 1. Yes _____<br>2. No _____                                                                                                                                                                                                                                     |
| 302                                 | Mufise imisegetera ingahe muri iyi nzu? <i>How many LLIN do you have in your household?</i>                                                                               |                                                                                                                                                                                                                                                                 |
| Section 4: Reasons for LLIN non-use |                                                                                                                                                                           |                                                                                                                                                                                                                                                                 |
| 401                                 | Imvo nyamukuru ituma mutaryama mumusegetera ni iyihe?<br><i>What is the main reason that you prefer not to sleep under LLIN?</i><br><br><b>Record one answer</b>          | 1. Too hot _____<br>2. Too cold _____<br>3. Not enough nets _____<br>4. Net not hung up _____<br>5. Net used by someone else _____<br>6. Net worn out or poor condition _____<br>7. Net bad for health _____<br>8. Other (specify) _____<br>9. Don't know _____ |
| 402                                 | Mwarigeze gukoresha umusegetera muri kimwe canke vyinshi bijanye no ...<br><i>Have you ever used LLIN for any of the following?</i><br><b>Multiple responses possible</b> | 1. Fishing _____<br>2. Covering or protection _____<br>3. Screens for windows _____<br>4. Clothing _____<br>5. Other (specify) _____<br>6. Don't know _____                                                                                                     |

| Section 5: LLIN weekly use |                                                                                                                                                                       |    |    |    |    |    |    |    |    |
|----------------------------|-----------------------------------------------------------------------------------------------------------------------------------------------------------------------|----|----|----|----|----|----|----|----|
| Household serial number    |                                                                                                                                                                       |    |    |    |    |    |    |    |    |
| No                         | IKIBAZO/Question                                                                                                                                                      | W1 | W2 | W3 | W4 | W5 | W6 | W7 | W8 |
| 501                        | Mwakoresha imisegetera ingahe mundwi iheze? <i>How many LLIN were used in this household last week?</i>                                                               |    |    |    |    |    |    |    |    |
| 502                        | Nibangahe baryamye mumusegetera mundwi iheze? <i>How many household members slept under LLIN last week?</i>                                                           |    |    |    |    |    |    |    |    |
| 503                        | Abana bari muni y'imyaka 5 baryamye mumusegetera ni bangahe mundwi iheze? <i>How many children under 5 years slept under LLIN last week?</i>                          |    |    |    |    |    |    |    |    |
| 504                        | Abagore bibungenze baryamye mumusegetera ni bangahe mundwi iheze? <i>How many pregnant women slept under LLIN last week?</i>                                          |    |    |    |    |    |    |    |    |
| 505                        | Abantu bose hamwe muri iyi nzu baryamye mumusegetera amajoro angahe mundwi iheze? <i>How many nights in the last week did all household members sleep under LLIN?</i> |    |    |    |    |    |    |    |    |
| 506                        | Abana bari muni y'imyaka 5 baryamye mumusegetera amajoro angahe mundwi iheze? <i>How many nights in the last week did children under 5 sleep under LLIN?</i>          |    |    |    |    |    |    |    |    |
| 507                        | Abagore bibungenze baryamye mumusegetera amajoro angahe mundwi iheze? <i>How many nights in the last week did pregnant women sleep under LLIN?</i>                    |    |    |    |    |    |    |    |    |
